# Supplementary material
Source: MDPI journal article supplement (https://www.mdpi.com/2227-9717/9/10/1767)
Supplement: s1 [file s1 › processes-1375691-supplementary.pdf]

## Supporting Information

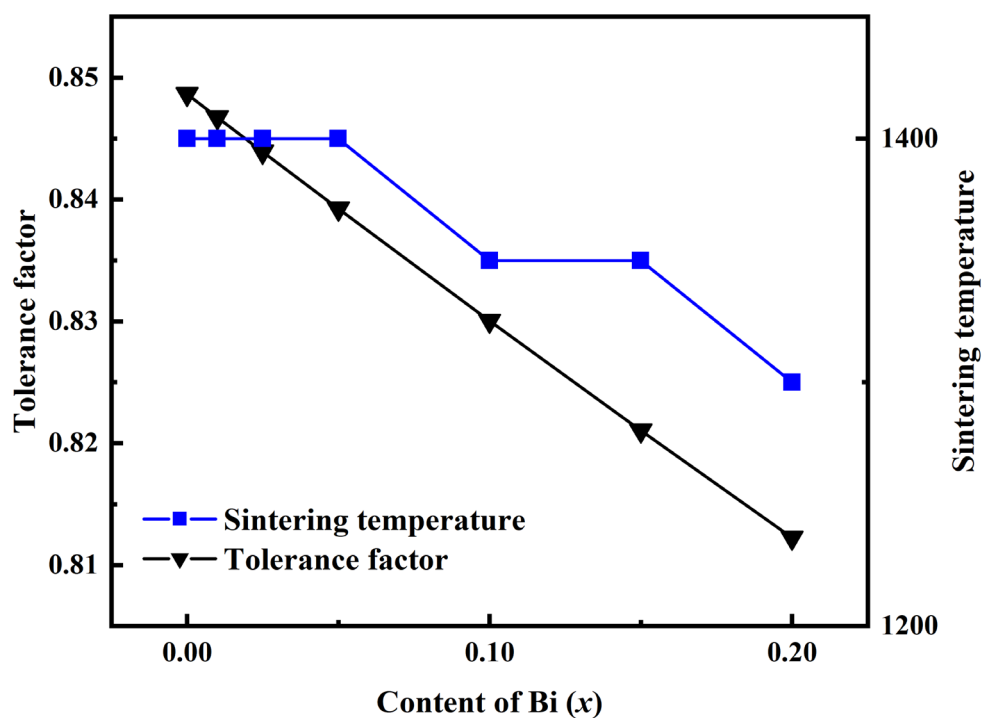

**Figure S1.** The tolerance factors and sintering temperatures of 60CPO-40PSF<sub>1-x</sub>B<sub>x</sub>O as a function of contents of Bi ( $x$ ).

**Table S1.** Density of fresh dual-phase 60CPO-40PSF<sub>1-x</sub>B<sub>x</sub>O membranes

|             | Theoretical density<br>(g/cm <sup>3</sup> ) | Volume density<br>(g/cm <sup>3</sup> ) | Porosity | Relative density |
|-------------|---------------------------------------------|----------------------------------------|----------|------------------|
| $x = 0.01$  | 6.8594                                      | 6.2498                                 | 8.89%    | 91.11%           |
| $x = 0.025$ | 6.8889                                      | 6.3756                                 | 7.45%    | 92.55%           |
| $x = 0.05$  | 6.9365                                      | 6.3756                                 | 8.09%    | 91.91%           |
| $x = 0.1$   | 7.0099                                      | 6.7129                                 | 4.24%    | 95.76%           |
| $x = 0.15$  | 7.1278                                      | 6.7165                                 | 5.77%    | 94.23%           |
| $x = 0.20$  | 7.2126                                      | 6.5964                                 | 8.54%    | 91.46%           |

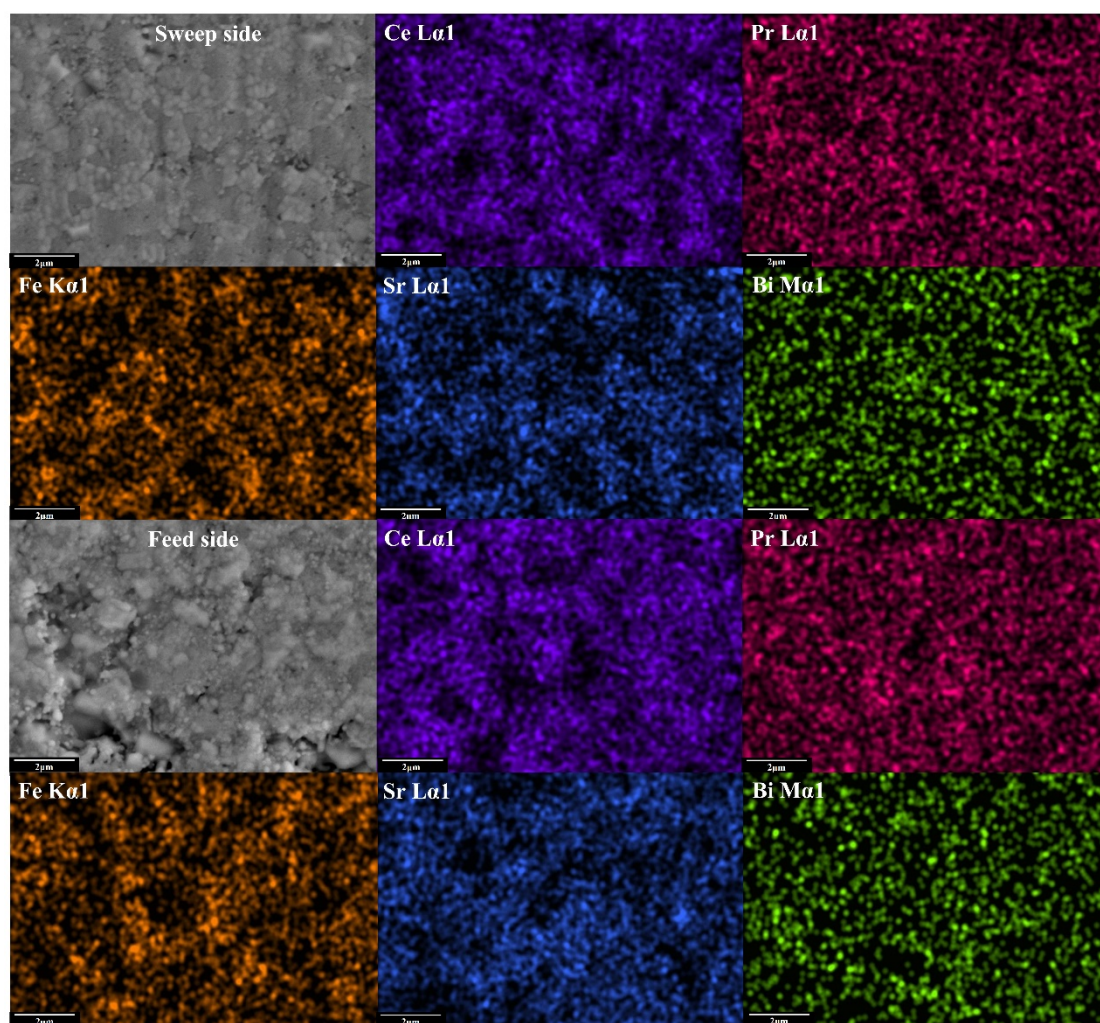

**Figure S2.** SEM images and EDXS mappings of two sides of the spent 60CPO-40PSFB<sub>0.01</sub>O membrane.

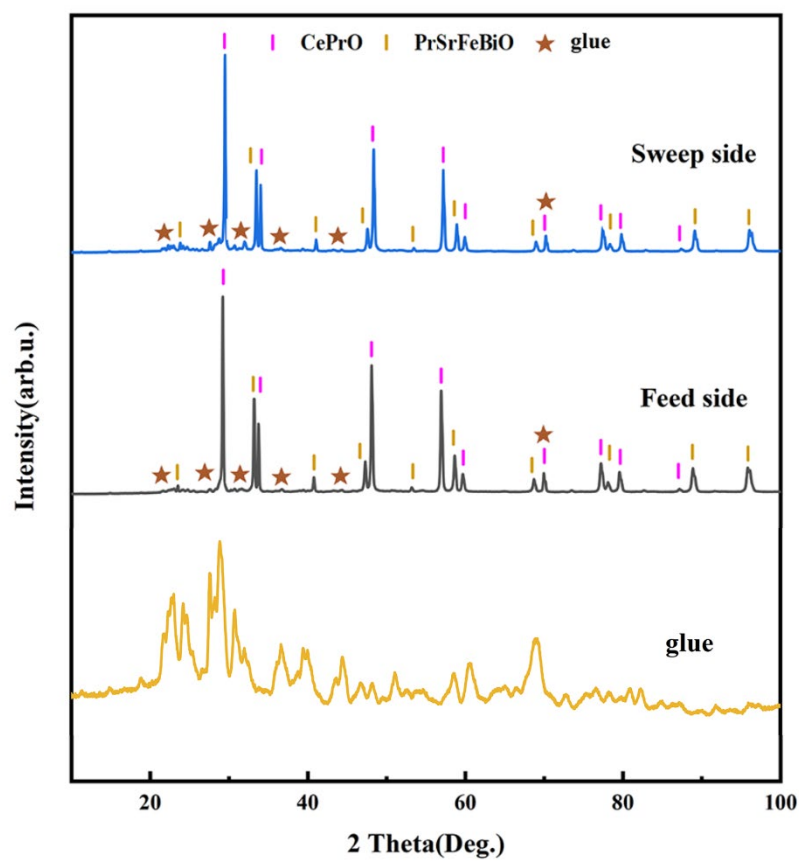

**Figure S3.** XRD patterns of two sides of the spent 60CPO-40PSFB<sub>0.01</sub>O membrane and glue for sealing.

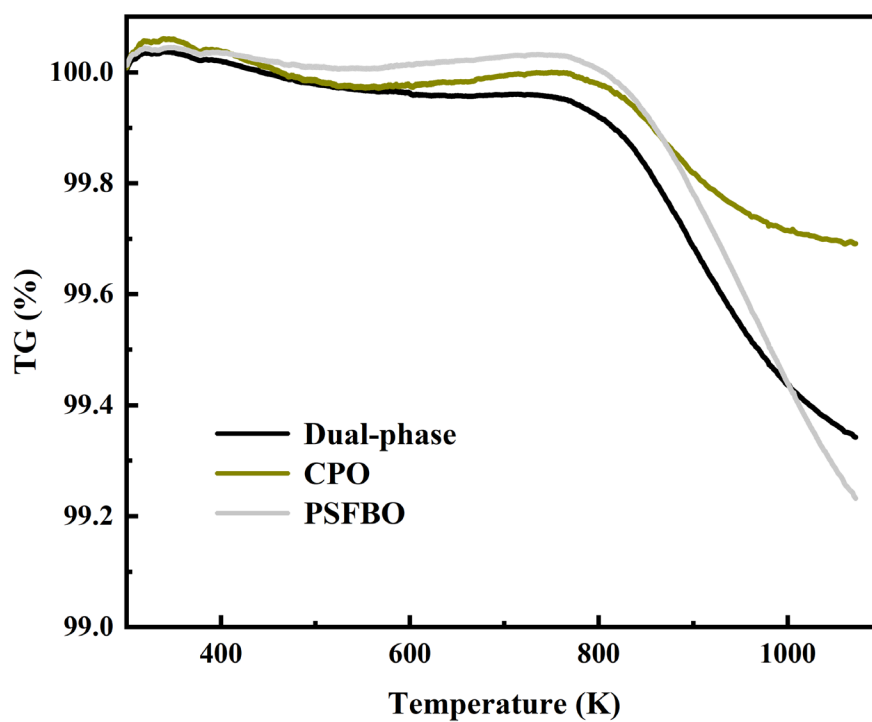

**Figure S4.** TGA results of 60CPO-40PSFB<sub>0.01</sub>O, CPO and PSFB<sub>0.01</sub>O powders.
